# Supplementary material for: Welfare Assessment: Correspondence Analysis of Welfare Score and Hematological and Biochemical Profiles of Dairy Cows in Sardinia, Italy
Source: MDPI journal article supplement (doi:10.3390/ani11030854), 2021-03-17
Supplement: s1 [file s1]

**Table S1.** Structure of welfare protocol.

| <i>Item</i> | <i>Section A1: Management factors</i>                    |
|-------------|----------------------------------------------------------|
| 1           | Number of stockpeople (ALL)                              |
| 2           | Experience and training of stockpersons (ALL)            |
| 3           | Animal grouping strategy (LC, DC, HF)                    |
| 4           | Inspections of animals (ALL)                             |
| 5           | Type of handling (LC)                                    |
| 6           | Milking parlor access and exit (LC)                      |
| 7           | Feeding strategy (LC, DC, HF)                            |
| 8           | Use of concentrated feeds (daily dose) (LC)              |
| 9           | Water provision (ALL)                                    |
| 10          | Cleanliness of water points (LC)                         |
| 11          | Cleanliness of water points (DC)                         |
| 12          | Cleanliness of water points (HF)                         |
| 13          | Cleanliness of floor in walking areas (LC)               |
| 14          | Cleanliness of floor in walking areas (DC)               |
| 15          | Cleanliness of floor in walking areas (HF)               |
| 16          | Bedding material management (LC)                         |
| 17          | Bedding material management (DC)                         |
| 18          | Use and management of calving pens (DC)                  |
| 19          | Bedding material management (HF)                         |
| 20          | Foot inspection and foot bathing (LC, DC)                |
| 21          | Hygiene (milking parlor or robot) (LC)                   |
| 22          | Milking routine (LC)                                     |
|             | <i>Section A2: Housing factors</i>                       |
| 1           | Housing of animals older than 6 months (LC, DC, HF)      |
| 2           | Space availability in lying area (LC)                    |
| 3           | Space availability in lying area 8 (DC)                  |
| 4           | Calving pen presence and size (DC)                       |
| 5           | Space availability in lying area (HF)                    |
| 6           | Design of lying area (LC)                                |
| 7           | Type of bedding material (LC)                            |
| 8           | Type of bedding material (DC)                            |
| 9           | Type of bedding material (HF)                            |
| 10          | Type of floor in walking areas (LC)                      |
| 11          | Type of floor in walking areas (DC)                      |
| 12          | Type of floor in walking areas (HF)                      |
| 13          | Available space at feed bunk (LC)                        |
| 14          | Available space at feed bunk (DC)                        |
| 15          | Available space at feed bunk (HF)                        |
| 16          | Feeding place dimension and accessibility (LC)           |
| 17          | Function and number of water points (LC)                 |
| 18          | Function and number of water points (DC)                 |
| 19          | Function and number of water points (HF)                 |
| 20          | Bedding material for new-born calves in single pens (CV) |
| 21          | Space availability for calves up to 8 weeks (CV)         |
| 22          | Possibility for calves to see and touch each other (CV)  |
| 23          | Space availability for calves in group pen (CV)          |
| 24          | Facilities for sick animals (ALL)                        |

|    |                                                                                |
|----|--------------------------------------------------------------------------------|
| 25 | Waiting room and milking parlor design (LC)                                    |
| 26 | Milking machine or robot maintenance (LC)                                      |
| 27 | Temperature, humidity, and ventilation (ALL)                                   |
| 28 | Gas (NH <sub>3</sub> , H <sub>2</sub> S, CO <sub>2</sub> ) concentration (ALL) |
| 29 | Use of artificial lighting (ALL)                                               |

---

#### *Section A3: Animal-based measures*

---

|    |                                         |
|----|-----------------------------------------|
| 1  | Lameness (LC, DC)                       |
| 2  | Annual mortality rate (CV)              |
| 3  | Annual mortality rate (LC DC)           |
| 4  | Antibiotic treatments for mastitis (LC) |
| 5  | Body condition score (LC)               |
| 6  | Integument alterations (LC)             |
| 7  | Body condition score (DC)               |
| 8  | Integument alterations (DC)             |
| 9  | Avoidance distance test (LC)            |
| 10 | Mutilations (ALL)                       |
| 11 | Avoidance distance test (DC)            |
| 12 | Integument alteration (HF)              |
| 13 | Body condition score (HF)               |
| 14 | Milk somatic cell count (LC)            |
| 15 | Avoidance distance test (HF)            |
| 16 | Cleanliness of flank, leg, udder (LC)   |
| 17 | Cleanliness of flank, leg, udder (DC)   |
| 18 | Cleanliness of flank, leg, udder (HF)   |

---

#### *Section B: Biosecurity*

---

|    |                                                                  |
|----|------------------------------------------------------------------|
| 1  | Biosecurity procedures in the fight against rodents and insects  |
| 2  | Presence of other animal species within the farm                 |
| 3  | General precautions for entry of strangers                       |
| 4  | Management of the entry of routine visitors                      |
| 5  | Disinfection of vehicles at the entrance to the farm             |
| 6  | Possibility of contact between foreign vehicles and bred animals |
| 7  | Collection of dead animal carcasses                              |
| 8  | Loading of live animals (e.g., for sale)                         |
| 9  | Buying and/or moving animals out of the farm                     |
| 10 | Quarantine                                                       |
| 11 | Control and prevention of mastitis                               |
| 12 | Control and prevention of major infectious diseases              |
| 13 | IBR health condition                                             |
| 14 | Paratuberculosis health condition                                |
| 15 | Control and analysis of water sources                            |

---

#### *Section C: Risks and alarm system*

---

|   |                          |
|---|--------------------------|
| 1 | Origin of drinking water |
| 2 | Noise                    |
| 3 | Ventilation system alarm |
| 4 | Fire alarm               |
| 5 | Electricity generator    |

---

All = all animal groups; DC = dry cows; HF = heifers; LC = lactating cows.

**Table S2.** Minimum number of animals to be observed for animal-based measures (ABMs) evaluation.

| Population (N) | Sample (n)  |
|----------------|-------------|
| ≤ 30           | All animals |
| 31–99          | 30–39       |
| 100–199        | 40–50       |
| 200–299        | 51–55       |
| 300–549        | 55–59       |
| 550–1000       | 60–63       |
| 1001–3000      | 63–65       |

**Table S3.** List of laboratory test parameters analyzed to evaluate the correspondence with animal welfare status observed with AWB-EF, by category (metabolic profile, electrophoresis, blood count).

| Acronym | Parameter                                   | Exam Type         |
|---------|---------------------------------------------|-------------------|
| WBC     | White blood cells                           | Blood count       |
| RBC     | Red blood cells                             | Blood count       |
| HGB     | Hemoglobin                                  | Blood count       |
| HCT     | Hematocrit                                  | Blood count       |
| MCV     | Average corpuscular volume                  | Blood count       |
| MCH     | Average hemoglobin content                  | Blood count       |
| MCHC    | Medium corpuscular hemoglobin concentration | Blood count       |
| RDW     | Amplitude of erythrocytes distribution      | Blood count       |
| HDW     | Amplitude of hemoglobin distribution        | Blood count       |
| PLT     | Platelets                                   | Blood count       |
| MPV     | Average platelet volume                     | Blood count       |
| NEUT%   | Percentage of Neutrophils                   | Blood count       |
| LYMPH%  | Percentage of Lymphocytes                   | Blood count       |
| MONO%   | Percentage of Monocytes                     | Blood count       |
| EOS%    | Percentage of Eosinophils                   | Blood count       |
| BASO%   | Percentage of Basophils                     | Blood count       |
| NEUT    | Total number of Neutrophils                 | Blood count       |
| LYMPH   | Total number of Lymphocytes                 | Blood count       |
| MONO    | Total number of Monocytes                   | Blood count       |
| EOS     | Total number of Eosinophils                 | Blood count       |
| BASO    | Total number of Basophils                   | Blood count       |
| A1GB    | ALFA1 globulins                             | Electrophoresis   |
| A2GB    | ALFA2 globulins                             | Electrophoresis   |
| BGB     | BETA globulins                              | Electrophoresis   |
| GGB     | GAMMA globulins                             | Electrophoresis   |
| ALB     | Albumin                                     | Metabolic profile |
| ALP     | ALP                                         | Metabolic profile |
| TB      | Total Bilirubin                             | Metabolic profile |
| CREA    | Creatinine                                  | Metabolic profile |
| GGT     | GGT                                         | Metabolic profile |
| GOT     | GOT/ASAT                                    | Metabolic profile |
| GPT     | GPT/ALAT                                    | Metabolic profile |
| TPRO    | Total Proteins                              | Metabolic profile |
| BUN     | Urea                                        | Metabolic profile |
